# Supplementary material
Source: PubMed Central journal article supplement (PMC2459341)
Supplement: NIHMS50701-supplement-Fig_1.pdf [file NIHMS50701-supplement-Fig_1.pdf]

TM1

Dros INAE-D 0 - - - - - M P G L V V F R R R W S V G S D D L V V P G A F L L T I H F I C F V I V S V S L V I F E Y N T R I L S V K  
Human DAGL $\alpha$  0 A S A E P P A M P G I V V F R R R W S V G S D D L V L P A I F L F L L H T T W F V I L S V V L F G L V Y N P H E A C S L  
Human DAGL $\beta$  0 - - - - - M P G M V L F G R R W A I A S D D L V F P G F F E L V V R V L W W I G I L T L Y L M H R G K L D C A G G A

TM2 TM3

Dros INAE-D 53 L L F Y H L I G Y L L I L F F S I C V E I G I C V I S M R G S I L D A E A R T S I N I W I Y L K S L V I L F D I A W L A  
Human DAGL $\alpha$  60 N L V D H G R G Y L G I L L S C M I A E M A I I W L S M R G G I L Y T E P R D S M Q Y V L Y V R L A I L V I E F I Y A I  
Human DAGL $\beta$  53 L L S S Y L I V L M I L L A V V I C T V S A I M C V S M R G T I C N P G P R K S M S K L L Y I R L A L F F P E M V W A S

TM4

Dros INAE-D 113 V G S V W L G H Y Y T T A P I D D P K K V Y I A I I I C N W A L V V I T L I T I W G T F D A A G R S W V K M K K Y Q R S  
Human DAGL $\alpha$  120 V G I V W L T Q Y Y T S C N D L T A K N V T L G M V V C N W V V I L S V C I T V L C V F D P T G R T F V K L R A T K R -  
Human DAGL $\beta$  113 L G A A W V A D G V Q C D R T V V N G - - I I A T V V V S W I I I A A T V V S I I I V F D P L G G K M A P Y S S A G P -

Dros INAE-D 173 M R E T E S R F N Y K R S N S M N R N W R Q R K V M R A Y Q D S W D H R C R L L F C M G S S E R N R N S F T D I A R L  
Human DAGL $\alpha$  179 - - - - - R Q R N L R T Y N L R H R - L E E G Q A T S W S R R L K V F L C C T R T K D S Q S D A Y S E I A Y L  
Human DAGL $\beta$  170 - - - - - S H L D S H D S S Q L L N G L K T A A T S V W E T R I K L L C C I G K D D H T R V A F S S T A E L

Dros INAE-D 233 L S D F F R E L D V V P S D V V A G L V L L R K F Q R L E R E A I V R Q R K N G T Y E F L S G V F I T E R T Q F L A L N  
Human DAGL $\alpha$  228 F A E F F R D L D I V P S D I A G L V L L R Q R Q R A K R N A V L D E A N N D I L A F L S G M P V T R N T K Y L D L K  
Human DAGL $\beta$  220 F S T Y E S D T D L V P S D I A A G L A L L H Q Q Q D N I R N - - - - - N Q E P A Q V V C H A P G S S Q E A D L D A E

Dros INAE-D 293 D A K N Y D F F Q T V I H Y M Y F A Q G A Y G W P M Y V I I N R S K - M W H L V P E L K C F G C C G - - T S D D T E V  
Human DAGL $\alpha$  288 N S Q E M L R Y K E V C Y Y M L F A L A A Y G W P M Y L M R K P A C G L C Q L A R S C S G C L C P A R P R F A P G V T I  
Human DAGL $\beta$  274 L E N - - - - - C H H Y M Q F A A A A Y G W P L Y I Y R N P L T G L C R I G G D C C R S - - - - - R T T D Y D L

Dros INAE-D 350 I Q D N C C L C N Y A A L K K T L Q L G - - D I D I V Y A T Y H V D V G E T P P F V A I D Y T H R A V V I S I R G T L  
Human DAGL $\alpha$  348 E E D N C C G C N A I A I R R H F L D E N M T A V D I V Y T S C H D A V Y E T P F Y V A V D H D K K K V V I S I R G T L  
Human DAGL $\beta$  320 V G G Q L N C H F G S I L H T T G L Q Y R - - D F I H V S F H D K V Y E L P F L V A L D H R K E S V V V A V R G T M

Dros INAE-D 407 S M K D I L T D L N A E G E V L P L Q P P R D D W L G H K G M V Q A A I Y I R N K L Q E E N L I E R A L Q R N P D R Q T  
Human DAGL $\alpha$  408 S P K D A L T D L T G D A E R L P V E G H H G T W L G H K G M V L S A E Y I K K K L E Q E M V L S Q A F G R D L G R G T  
Human DAGL $\beta$  377 S L Q P V L T D L S A E S E V L D V E C E V Q D R L A H K G I S Q A A R Y V Y Q R L I N D G I L S Q A F S T A P - - -

\* LIPASE DOMAIN

Dros INAE-D 467 H T F D L V L V G H S L G A G T A A I L A I L L K P E H P T L Q C F S Y S P P G G L L S M P A V E Y S K S F I T S V V L  
Human DAGL $\alpha$  468 K H Y G L I V V G H S L G A G T A A I L S F L L R P Q Y P T L K C F A Y S P P G G L L S E D A M E Y S K E F V T A V V L  
Human DAGL $\beta$  433 - E Y R L V I V G H S L G G G A A L L A T M L R A A Y P Q V R C Y A F S P P R G L W S K A L Q E Y S Q S F I V S L V L

Dros INAE-D 527 G K D V V P R I G L N O M E A L R A D L I N A I Q R S V D P K W K T I S C S V I C C G C G P E P T S V V N M S - - - - -  
Human DAGL $\alpha$  528 G K D V V P R I G L S Q L E G F R R Q L L D V L Q R S T K P K W R I I V G A T K C I P K S E L P E E V E V T T - - - - -  
Human DAGL $\beta$  492 G K D V I P R L S V T N L E D L K R R I L R V V A H C N K P K Y K I L L H G L W Y E L F G G N P N N L P T E L D G G D Q

Dros INAE-D 582 - G Q D T H I N Q Y Q E E R G T A R S T S A H P T D S S I A L T - L H Q P L Y P P G R I I H I V R H H P K P D E Q K Y D  
Human DAGL $\alpha$  583 - L A S T R L - - - - - W T H P S D L T I A L S - A S T P L Y P P G R I I H V V H N H P - - - - -  
Human DAGL $\beta$  552 E V L T Q P L L G E Q S L L T R W S P A Y S F S S D S P L D S S P K Y P P L Y P P G R I I H L Q E E G A - - - - -

Dros INAE-D 640 S G W R N V L K N R E P V Y Q A I W A D S T D F D E V L I S P V M L Q D H M P D K V L A A L K K V V S C R D R - - - - -  
Human DAGL $\alpha$  620 A E Q C C C E Q E E P T Y F A I W G D N K A F N E V I I S P A M L H E H L P Y V V M E G L N K V L E N Y N K G K T A L  
Human DAGL $\beta$  604 S G R F G C G S - - A A H Y S A K W S H E A E F S K I L I G P K M L T D H M P D I L M R A L D S V V S - - - - -

Dros INAE-D 695 - - - - -  
Human DAGL $\alpha$  680 L S A A K V M V S P T E V D L T P E L I F Q Q Q P L P T G P P M P T G L A L E L P T A D H R N S S V R S K S Q S E M S L  
Human DAGL $\beta$  653 - - - - -

Dros INAE-D 695 - - - - - T V K A C T T R - - - - -  
Human DAGL $\alpha$  740 E G F S E G R L L S P V V A A A A R Q D P V E L L L L S T Q E R L A A E L Q A R R A P L A T M E S L S D T E S L Y S F D  
Human DAGL $\beta$  653 - - - - -

Dros INAE-D 703 - R R N - - - - - D N T T I T T T T V T T T T T T Q N - T D T  
Human DAGL $\alpha$  800 S R R S S G F R S I R G S P S L H A V L E R D E G H L F Y I D P A I P E E N P S L S S R T E L L A A D S L S K H S Q D T  
Human DAGL $\beta$  653 - - - - - D R A A C V S C P A Q G V S S V D V

Dros INAE-D 729 R - - - - - Y S R P P S I - - - - -  
Human DAGL $\alpha$  860 Q P L E A A L G S G G V T P E R P P S A A A N D E E E E V G G G G G P A S R G E L A L H N G R L G D S P S P Q V L E F  
Human DAGL $\beta$  671 A - - - - -

Dros INAE-D 920 - - - - -  
Human DAGL $\alpha$  920 A E F I D S L F N L D S K S S S F Q D L Y C M V V P E S P T S D Y A E G P K S P S Q Q E I L L R A Q F E P N L V P K P P  
Human DAGL $\beta$  - - - - -

Dros INAE-D 980 - - - - -  
Human DAGL $\alpha$  980 R L F A G S A D P S S G I S L S P S F P L S S S G E L M D L T P T G L S S Q E C L A A D K I R T S T P T G H G A S P A K  
Human DAGL $\beta$  - - - - -

Dros INAE-D 1040 - - - - -  
Human DAGL $\alpha$  1040 Q D E L V I S A R  
Human DAGL $\beta$  - - - - -
